# Supplementary material
Source: HighWire-hosted journal article supplement (http://www.ajnr.org/highwire/filestream/89543/field_highwire_adjunct_files/0/1102.pdf)
Supplement: 1102.pdf [file 1102.pdf]

## Supplementary Table 1.

Annual lumbar puncture counts, rates, and percentages of procedures by provider specialty over time

|                                                | 2004              | 2005              | 2006              | 2007              | 2008              | 2009              | 2010              | 2011              | 2012              | 2013              | 2014              | 2015              | 2016              | 2017              | CAGR* |
|------------------------------------------------|-------------------|-------------------|-------------------|-------------------|-------------------|-------------------|-------------------|-------------------|-------------------|-------------------|-------------------|-------------------|-------------------|-------------------|-------|
| <b>Annual LP rates and counts#</b>             |                   |                   |                   |                   |                   |                   |                   |                   |                   |                   |                   |                   |                   |                   |       |
| <b>LP Count</b>                                | 2,457             | 2,956             | 2,769             | 2,635             | 2,631             | 2,489             | 2,537             | 2,614             | 2,762             | 2,652             | 2,686             | 2,636             | 2,511             | 2,691             | -     |
| <b>LP Rate#</b>                                | 163.3             | 199.7             | 192.0             | 187.7             | 191.3             | 182.6             | 185.5             | 190.7             | 201.0             | 191.9             | 195.1             | 190.7             | 191.4             | 203.4             | 1.7%  |
| <b>(95% CI)</b>                                | (156.9-<br>169.8) | (192.6-<br>207.1) | (185.0-<br>199.3) | (180.6-<br>195.0) | (184.0-<br>198.7) | (175.5-<br>189.9) | (178.4-<br>192.9) | (183.5-<br>198.2) | (193.6-<br>208.6) | (184.7-<br>199.4) | (187.8-<br>202.6) | (183.5-<br>198.1) | (184.0-<br>199.0) | (195.8-<br>211.3) |       |
| <b>Percentages of LPs by specialty by year</b> |                   |                   |                   |                   |                   |                   |                   |                   |                   |                   |                   |                   |                   |                   |       |
| <b>Radiology</b>                               | 37.1%             | 40.3%             | 42.4%             | 44.6%             | 42.5%             | 44.7%             | 45.4%             | 48.4%             | 46.9%             | 50.2%             | 52.1%             | 54.1%             | 54.5%             | 54.0%             | 2.9%  |
| <b>EM</b>                                      | 17.4%             | 19.0%             | 19.6%             | 18.5%             | 20.2%             | 19.7%             | 19.8%             | 20.1%             | 21.1%             | 18.9%             | 17.8%             | 16.8%             | 15.4%             | 14.9%             | -1.2% |
| <b>Neurology</b>                               | 23.5%             | 20.9%             | 19.0%             | 18.3%             | 17.3%             | 14.6%             | 14.7%             | 12.2%             | 11.5%             | 11.4%             | 10.4%             | 10.6%             | 9.8%              | 10.0%             | -6.4% |
| <b>NPP</b>                                     | 4.2%              | 2.5%              | 2.7%              | 2.5%              | 3.2%              | 4.4%              | 4.1%              | 4.4%              | 5.4%              | 6.0%              | 5.8%              | 6.0%              | 6.5%              | 7.5%              | 4.5%  |
| <b>Neurosurgery</b>                            | 4.8%              | 4.2%              | 4.7%              | 4.0%              | 4.9%              | 4.7%              | 4.2%              | 4.3%              | 4.6%              | 4.4%              | 4.4%              | 3.9%              | 4.1%              | 4.5%              | -0.4% |
| <b>Primary Care</b>                            | 5.1%              | 5.2%              | 5.0%              | 4.3%              | 3.6%              | 4.0%              | 3.6%              | 4.2%              | 3.2%              | 3.1%              | 3.0%              | 2.9%              | 3.4%              | 2.6%              | -5.1% |
| <b>Anesthesiology</b>                          | 4.5%              | 4.7%              | 4.0%              | 3.9%              | 4.2%              | 4.6%              | 4.5%              | 3.3%              | 3.7%              | 2.6%              | 3.0%              | 2.5%              | 3.0%              | 2.3%              | -4.9% |
| <b>All Other</b>                               | 3.4%              | 3.3%              | 2.7%              | 3.8%              | 4.0%              | 3.2%              | 3.7%              | 3.0%              | 3.8%              | 3.4%              | 3.6%              | 3.3%              | 3.4%              | 4.2%              | 1.5%  |

# = counts and rates (per 100,000) are calculated using a 5% sample of Medicare beneficiaries

CI = Confidence Interval

EM = Emergency Medicine

NPP = Non-physician provider

CAGR\* = compound annual growth rate, 2004 versus 2017

## Supplementary Table 2.

Mean patient Charlson Comorbidity Index scores of lumbar punctures performed by radiologists versus all other specialties

|                        | 2005   | 2006   | 2007   | 2008 | 2009   | 2010 | 2011 | 2012   | 2013   | 2014   | 2015 | 2016   | 2017   | 2005 - 2017<br>Mean (SD) | CAGR* |
|------------------------|--------|--------|--------|------|--------|------|------|--------|--------|--------|------|--------|--------|--------------------------|-------|
| <b>All Specialties</b> | 1.92   | 2.26   | 2.37   | 2.28 | 2.41   | 2.44 | 2.46 | 2.66   | 2.63   | 2.65   | 2.59 | 2.90   | 3.01   | 2.50 (2.67)              | 3.8%  |
| <b>Non-Radiology</b>   | 1.84   | 2.16   | 2.23   | 2.26 | 2.27   | 2.40 | 2.50 | 2.51   | 2.5    | 2.51   | 2.52 | 2.76   | 2.92   | 2.39 (2.59)              | 3.9%  |
| <b>Radiology</b>       | 2.03   | 2.38   | 2.54   | 2.30 | 2.59   | 2.49 | 2.43 | 2.84   | 2.76   | 2.77   | 2.65 | 3.01   | 3.09   | 2.62 (2.75)              | 3.6%  |
| <b>P value#</b>        | < 0.05 | < 0.05 | < 0.05 | 0.62 | < 0.05 | 0.22 | 0.34 | < 0.05 | < 0.05 | < 0.05 | 0.07 | < 0.05 | < 0.05 | < 0.05                   |       |

#t-test for whether the mean CCI value, in a given year, is significantly different between Non-Radiologists and Radiologists. P value < 0.05 indicates the proportion is statistically different.

CAGR\* = compound annual growth rate, 2005 versus 2017

SD = standard deviation

### Supplementary Table 3.

Percentages of Lumbar Punctures performed by Radiologists in 2004 and 2017 by State

|                             | 2004                  |                | 2017                  |              |
|-----------------------------|-----------------------|----------------|-----------------------|--------------|
|                             | % LPs by Radiologists | 95% CI         | % LPs by Radiologists | 95% CI       |
| <b>Alabama</b>              | 50.9%                 | 50.4 - 51.5%   | 60.5%                 | 59.8 - 61.1% |
| <b>Alaska</b>               | 50.0%                 | 47.8 - 52.2%   | 14.3%                 | 13.1 - 15.5% |
| <b>Arizona</b>              | 45.3%                 | 44.6 - 45.9%   | 59.2%                 | 58.6 - 59.8% |
| <b>Arkansas</b>             | 42.9%                 | 42.2 - 43.6%   | 73.7%                 | 73.0 - 74.4% |
| <b>California</b>           | 33.5%                 | 33.2 - 33.8%   | 45.9%                 | 45.6 - 46.2% |
| <b>Colorado</b>             | 31.7%                 | 31.0 - 32.5%   | 51.4%                 | 50.7 - 52.2% |
| <b>Connecticut</b>          | 31.6%                 | 31.0 - 32.2%   | 45.7%                 | 45.0 - 46.5% |
| <b>Delaware</b>             | 28.6%                 | 27.4 - 29.8%   | 40.0%                 | 38.8 - 41.2% |
| <b>District of Columbia</b> | 100.0%                | 100.0 - 100.0% | 83.3%                 | 81.8 - 84.9% |
| <b>Florida</b>              | 50.4%                 | 50.1 - 50.7%   | 58.9%                 | 58.6 - 59.2% |
| <b>Georgia</b>              | 30.2%                 | 29.7 - 30.6%   | 37.2%                 | 36.7 - 37.7% |
| <b>Hawaii</b>               | 50.0%                 | 48.6 - 51.4%   | 90.9%                 | 90.1 - 91.7% |
| <b>Idaho</b>                | 57.1%                 | 56.0 - 58.3%   | 57.9%                 | 56.8 - 59.0% |
| <b>Illinois</b>             | 29.5%                 | 29.2 - 29.9%   | 47.4%                 | 47.0 - 47.8% |
| <b>Indiana</b>              | 48.8%                 | 48.3 - 49.2%   | 67.9%                 | 67.3 - 68.4% |
| <b>Iowa</b>                 | 35.3%                 | 34.7 - 35.9%   | 77.4%                 | 76.8 - 78.0% |
| <b>Kansas</b>               | 55.0%                 | 54.3 - 55.7%   | 60.0%                 | 59.2 - 60.8% |
| <b>Kentucky</b>             | 21.4%                 | 20.9 - 21.9%   | 30.4%                 | 29.8 - 31.1% |
| <b>Louisiana</b>            | 66.7%                 | 66.0 - 67.3%   | 63.9%                 | 63.2 - 64.6% |
| <b>Maine</b>                | 14.3%                 | 13.6 - 15.0%   | 41.7%                 | 40.6 - 42.8% |
| <b>Maryland</b>             | 30.6%                 | 30.0 - 31.1%   | 55.6%                 | 55.0 - 56.1% |
| <b>Massachusetts</b>        | 13.3%                 | 13.0 - 13.7%   | 38.9%                 | 38.4 - 39.4% |
| <b>Michigan</b>             | 29.9%                 | 29.6 - 30.3%   | 52.1%                 | 51.7 - 52.6% |
| <b>Minnesota</b>            | 38.2%                 | 37.6 - 38.8%   | 56.3%                 | 55.4 - 57.1% |
| <b>Mississippi</b>          | 57.1%                 | 56.4 - 57.9%   | 85.3%                 | 84.8 - 85.8% |
| <b>Missouri</b>             | 35.6%                 | 35.0 - 36.1%   | 60.0%                 | 59.4 - 60.6% |
| <b>Montana</b>              | 18.2%                 | 17.3 - 19.1%   | 47.1%                 | 45.8 - 48.3% |
| <b>Nebraska</b>             | 21.4%                 | 20.7 - 22.2%   | 58.3%                 | 57.4 - 59.2% |
| <b>Nevada</b>               | 53.8%                 | 52.8 - 54.9%   | 80.6%                 | 79.8 - 81.3% |
| <b>New Hampshire</b>        | 11.1%                 | 10.4 - 11.8%   | 45.5%                 | 44.4 - 46.5% |
| <b>New Jersey</b>           | 25.0%                 | 24.6 - 25.4%   | 53.5%                 | 53.1 - 54.0% |

|                       |        |                |        |                |
|-----------------------|--------|----------------|--------|----------------|
| <b>New Mexico</b>     | 16.7%  | 15.9 - 17.5%   | 35.0%  | 34.0 - 36.0%   |
| <b>New York</b>       | 24.7%  | 24.5 - 25.0%   | 43.5%  | 43.2 - 43.9%   |
| <b>North Carolina</b> | 27.9%  | 27.5 - 28.3%   | 40.0%  | 39.5 - 40.5%   |
| <b>North Dakota</b>   | 40.0%  | 38.6 - 41.4%   | 33.3%  | 31.9 - 34.8%   |
| <b>Ohio</b>           | 45.8%  | 45.5 - 46.2%   | 60.0%  | 59.6 - 60.4%   |
| <b>Oklahoma</b>       | 33.3%  | 32.7 - 34.0%   | 38.5%  | 37.8 - 39.1%   |
| <b>Oregon</b>         | 19.2%  | 18.6 - 19.9%   | 58.1%  | 57.3 - 58.8%   |
| <b>Pennsylvania</b>   | 29.3%  | 29.0 - 29.7%   | 56.4%  | 56.0 - 56.8%   |
| <b>Rhode Island</b>   | 6.7%   | 5.9 - 7.4%     | 12.5%  | 11.5 - 13.5%   |
| <b>South Carolina</b> | 26.8%  | 26.3 - 27.4%   | 55.0%  | 54.4 - 55.6%   |
| <b>South Dakota</b>   | 100.0% | 100.0 - 100.0% | 100.0% | 100.0 - 100.0% |
| <b>Tennessee</b>      | 41.2%  | 40.7 - 41.7%   | 67.2%  | 66.7 - 67.8%   |
| <b>Texas</b>          | 55.2%  | 54.9 - 55.5%   | 67.8%  | 67.5 - 68.1%   |
| <b>Utah</b>           | 59.1%  | 58.1 - 60.1%   | 38.5%  | 37.4 - 39.5%   |
| <b>Vermont</b>        | 20.0%  | 18.8 - 21.2%   | 50.0%  | 48.6 - 51.4%   |
| <b>Virginia</b>       | 27.5%  | 27.1 - 28.0%   | 40.0%  | 39.5 - 40.5%   |
| <b>Washington</b>     | 44.7%  | 44.2 - 45.3%   | 60.7%  | 60.2 - 61.3%   |
| <b>West Virginia</b>  | 16.7%  | 16.0 - 17.3%   | 40.0%  | 39.0 - 41.0%   |
| <b>Wisconsin</b>      | 37.3%  | 36.7 - 37.8%   | 54.2%  | 53.6 - 54.9%   |
| <b>Wyoming</b>        | 57.1%  | 55.4 - 58.9%   | 57.1%  | 55.6 - 58.7%   |

LP = Lumbar Puncture

CI = Confidence Interval
